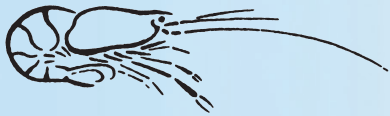

## Feeding on cnidarians by giant pycnogonids (Pycnogonida: Colossendeidae Jarzinsky, 1870) in the North Central Pacific and North Atlantic oceans

Mary K. Wicksten

*Department of Biology, Texas A&M University, College Station TX 77843-3258, USA*

(Received 2 March 2017; accepted 22 March 2017)

### ABSTRACT

At Physalia Seamount, North Atlantic and West Pioneer Bank, North Central Pacific, the remotely operated vehicle *Deep Discoverer* photographed giant pycnogonids of the genus *Colossendeis* Jarzinsky, 1870 feeding on cnidarians, a solitary hydroid, and a coronate medusa, respectively. Coupled with previous published reports and recent photographs from Antarctica, these latest photographs indicate that cnidarians constitute a common prey for species of *Colossendeis*.

**Key Words:** behavior, deep-sea fauna, sea spiders

Among the most bizarre deep-sea benthic animals are giant pycnogonids (family Colossendeidae). Seventy-one species of the genus *Colossendeis* Jarzinsky, 1870 have been described (Bamber *et al.*, 2017). The most detailed study of feeding in these pycnogonids is Braby *et al.* (2009), who photographed *Colossendeis gigas* Hoek, 1881 and *C. japonica* Hoek, 1898 feeding on the sea anemones *Anthosactis pearseae* Daly & Gusmão, 2007 and *Liponema brevicornis* (McMurrich, 1893). *Colossendeis proboscidea* (Sabine, 1824) and *C. robusta* Hoek, 1881 have been reported to “feed in soft sediments” or be deposit feeders (Meyer 2013; Stout and Shabica 1970). Shabica (1977) reported that *C. robusta* and *C. megalonyx* Hoek, 1881 preyed on the limpet *Nacella concinna* (Strebel, 1908) (as *Patinigera polaris*). *Colossendeis megalonyx*, *C. robusta*, and *C. scotti* Calman, 1915 were caught in baited traps in Antarctica and nearby islands (Arnaud, 1972). *Colossendeis megalonyx* has been photographed in Antarctic waters sucking on a sea anemone (N. Wu, pers. comm.), and *Colossendeis* sp. fed on medusae entrapped by sea anemones (A. Moran, pers. comm.).

The National Oceanographic and Atmospheric Administration (USA) RV *Okeanos Explorer* conducted in 2012 studies on the marine life of deeper areas of seamounts in the North Atlantic. The ship visited areas within or southwest of the Papahānaumokuākea Marine National Monument, northwest of the main Hawaiian Islands. The remotely operated vehicle (ROV) *Deep Discoverer* obtained high-definition video footage of the biota on deep hard substrates. The ROV was equipped with paired lasers mounted on the video camera that provided a scale of 10 cm. The camera could focus on animals as small as 7 cm from a distance of 3 m. The ROV had collecting baskets and a manipulative arm but did not collect any pycnogonids.

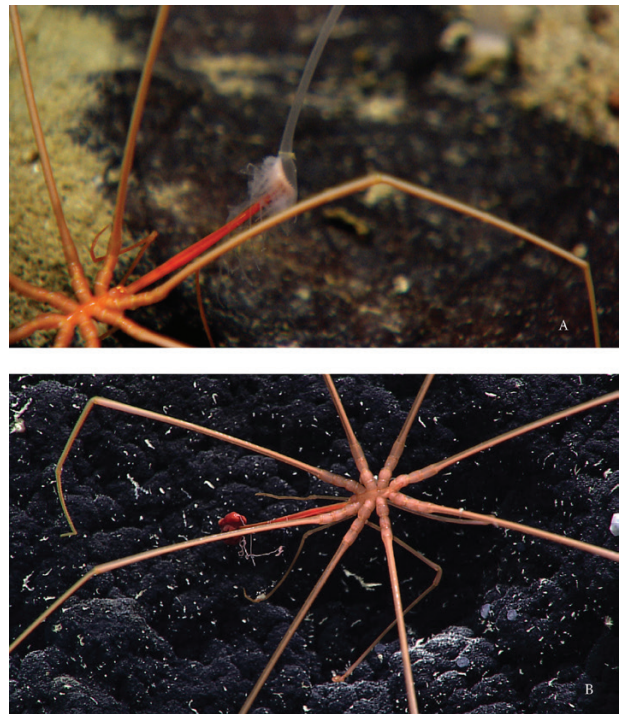

**Figure 1.** Giant sea spiders, *Colossendeis* spp. feeding on solitary hydroid, Physalia Seamount, 2480 m (A); feeding on medusa fragment, West Pioneer Bank, 1284 m (B). Photographs courtesy of NOAA Office of Ocean Exploration and Research 2014, 2016.

During Expedition 1401, Dive 11, 1 October 2014, the ship explored Physalia Seamount (39.81°N, 66.93°W). At 2480 m, the ROV encountered a large pycnogonid, *Colossendeis* sp., feeding on a large solitary hydroid (Fig. 1A). The photograph shows the proboscis inserted into the hydroid. During Expedition 1603, Dive 4, 4 March 2016, the ship explored West Pioneer Bank pinnacle (26.15°N, 173.36°W). At 1284 m the ROV encountered a large (estimated leg span 25 cm) sea spider on a steep, barren rocky slope. This sea spider, another species of *Colossendeis*, held a cnidarian at the apex of its long proboscis, presumably feeding on it (Fig. 1B). The prey may have been a medusa (Scyphozoa: Coronatae), which was swept against the rocks. Unidentified red coronate medusae were photographed soon before the giant sea spider was seen. The very long proboscis of both sea spiders resembles that of *Colossendeis macerrima* Wilson, 1881, which is known from the North Atlantic, Flores Sea, southern and southeastern Pacific, and Southern Ocean, Antarctica. This species has not been reported from the vicinity of the Hawaiian Islands. Definitive identification of the species would require specimens and closer examination of the body and legs, especially critical because of taxonomic confusion among similar species. Although the identifications of these sea spiders and their prey remain uncertain, these observations suggest that cnidarians constitute a common prey for species of *Colossendeis*.

#### ACKNOWLEDGMENTS

The photographs were taken under the auspices of the National Oceanographic and Atmospheric Administration Office of Ocean Exploration and Research, 2014 “Our Deepwater Backyard: Exploring Atlantic Canyons and Seamounts” and 2016 “Hohonu Moana: Exploring Deep Waters off Hawai‘i.” I thank photographer Norbert Wu, Pacific Grove, California and Amy Moran of the University of Hawai‘i at Mānoa, for sharing information on feeding by pycnogonids, and Christopher Mah, United States Museum of Natural History, and Megan Cromwell, NOAA National Centers for Environmental Information, for help in locating the photographs from the north Atlantic.

#### REFERENCES

- Arnaud, P.M. 1972. Marine invertebrates collected from the Adèle Coast by the 12<sup>th</sup> and 15<sup>th</sup> French Antarctic Expeditions. 9. Pycnogonida. *Expéditions Polaires Françaises. Missions Paul-Emile Victor*, **258**: 1–69.
- Bamber, R. N., El Nagar, A., & C. Arango, (eds). 2017. Pycnobase: World Pycnogonida Database [<http://www.marinespecies.org/pycnobase>].
- Braby, C.E., Pearse, V.B., Bain, B.A. & Vrijenhoek, R.C. 2009. Pycnogonid-cnidarian trophic interactions in the Deep Monterey Submarine Canyon. *Invertebrate Zoology*, **128**: 359–363.
- Calman, W.T. 1915. Pycnogonida. *British Antarctic (Terra Nova) Expedition, 1910*. *Zoology*, **3**: 1–74.
- Hoek, P.C. 1881. Report on the Pycnogonida dredged by HMS *Challenger* 1873–76. *Reports of the Scientific Results of the Exploring Voyage of HMS Challenger*, *Zoology*, **3**: 1–167.
- Hoek, P.C. 1898. On four pycnogonids dredged during the cruise of the *Challenger*. *Tijdschrift der Nederlandsche Dierkundige Vereeniging*, **5**: 290–301.
- Jarzynsky, T. 1870. Praemissus catalogus Pycnogonidarum, inventartum in mari Glaciali, ad oras Lapponiae rossicae et in mari Albo, anno 1869 et 1870. *Annales de la Société des Naturalistes de St. Pétersbourg*, **1**: 319–320.
- Meyer, K.S., Bergmann, M. & Soltwedel, T. 2013. Interannual variation in the epibenthic megafauna at the shallowest station of the HAUSGARTEN observatory (79°N, 6°E). *Biogeosciences*, **10**: 3479–3492.
- Sabine, E. 1824. Invertebrate animals. In: W.E. Parry, *Journal of a voyage for the discovery of a north-west passage from the Atlantic to the Pacific; performed in the years 1819–20, in His Majesty's ships Hecla and Griper, under the orders of William Edward Parry, R.N., F.R.S., and commander*, pp. 119–139. John Murray, London.
- Shabica, S.V. 1977. The natural history of the Antarctic limpet *Patinigera polaris* (Hombron and Jacquinot). Ph.D. thesis, Department of Oceanography, Oregon State University, Corvallis, OR.
- Stout, W.E. & Shabica, S.V. 1970. Marine ecological studies at Palmer Station and vicinity. *Antarctic Journal of the United States* **5**: 134–135.
- Wilson, E.B. 1881. Reports on the Pycnogonida. Reports on the results of dredging under the Supervision of Alexander Agassiz, along the East Coast of the United States, during the Summer of 1880, by the U.S. Coast Survey Steamer “Blake”, Commander J.R. Bartlett, U.S.N. commanding. *Bulletin of the Museum of Comparative Zoology, Harvard*, **8**(12): 239–256.
